# Supplementary material for: Large-scale fabrication of highly aligned poly(m-phenylene isophthalamide) nanofibers with robust mechanical strength
Source: Royal Society of Chemistry journal article supplement (doi:10.1039/c4ra07901a), 2014-09-05
Supplement: c4ra07901a1.pdf [file c4ra07901a1.pdf]

Electrical Supplementary Information for

**Large-scale fabrication of highly aligned poly(m-phenylene  
isophthalamide) nanofibers with robust mechanical strength**

**Kun Chen,<sup>‡a</sup> Shichao Zhang,<sup>‡a</sup> Bowen Liu,<sup>a</sup> Xue Mao,<sup>a</sup> Gang Sun,<sup>b</sup>**

**Jianyong Yu,<sup>b</sup> Salem S. Al-Deyab,<sup>c</sup> and Bin Ding<sup>\*ab</sup>**

<sup>a</sup> State Key Laboratory for Modification of Chemical Fibers and Polymer Materials, College of Materials Science and Engineering, Donghua University, Shanghai 201620, China. E-mail: binding@dhu.edu.cn

<sup>b</sup> Key Laboratory of Textile Science & Technology, College of Textiles, Donghua University, Shanghai 201620, China.

<sup>c</sup> Petrochemical Research Chair, Department of Chemistry, College of Science, King Saud University, Riyadh 11451, Saudi Arabia.

<sup>‡</sup> These authors have contributed equally to this work.

**Table S1** Compositions and properties of various electrospinning solutions.

| <b>PMIA<br/>(wt%)</b> | <b>LiCl<br/>(wt%)</b> | <b>Viscosity<br/>(cps)</b> | <b>Conductivity<br/>(mS cm<sup>-1</sup>)</b> | <b>Surface tension<br/>(mN m<sup>-1</sup>)</b> |
|-----------------------|-----------------------|----------------------------|----------------------------------------------|------------------------------------------------|
| <b>7.5</b>            | <b>2</b>              | <b>458</b>                 | <b>3.80</b>                                  | <b>36.67</b>                                   |
| <b>10.0</b>           | <b>2</b>              | <b>1295</b>                | <b>3.20</b>                                  | <b>36.38</b>                                   |
| <b>12.5</b>           | <b>2</b>              | <b>4033</b>                | <b>2.69</b>                                  | <b>36.12</b>                                   |
| <b>15.0</b>           | <b>2</b>              | <b>9943</b>                | <b>2.19</b>                                  | <b>35.79</b>                                   |

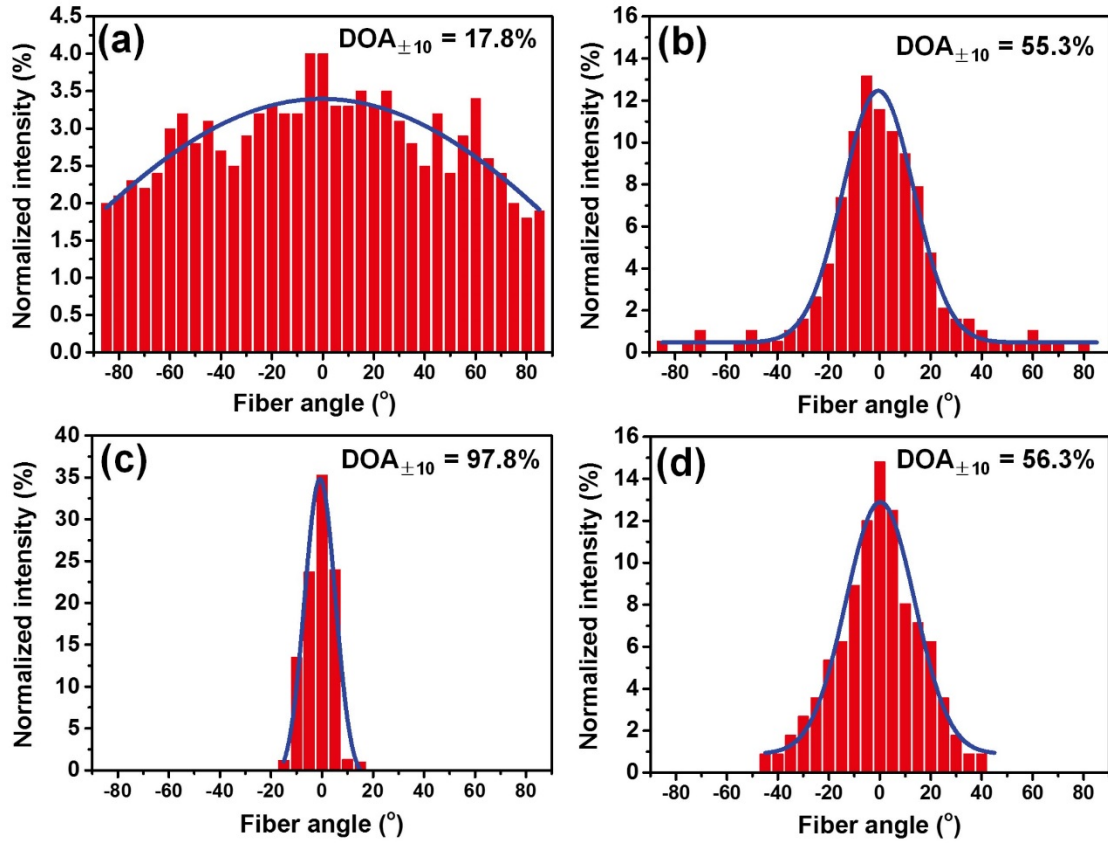

**Fig. S1** The alignment degree of PMIA nanofibrous membranes fabricated at RH of (a) 35%, (b) 45%, (c) 55%, and (d) 65%.

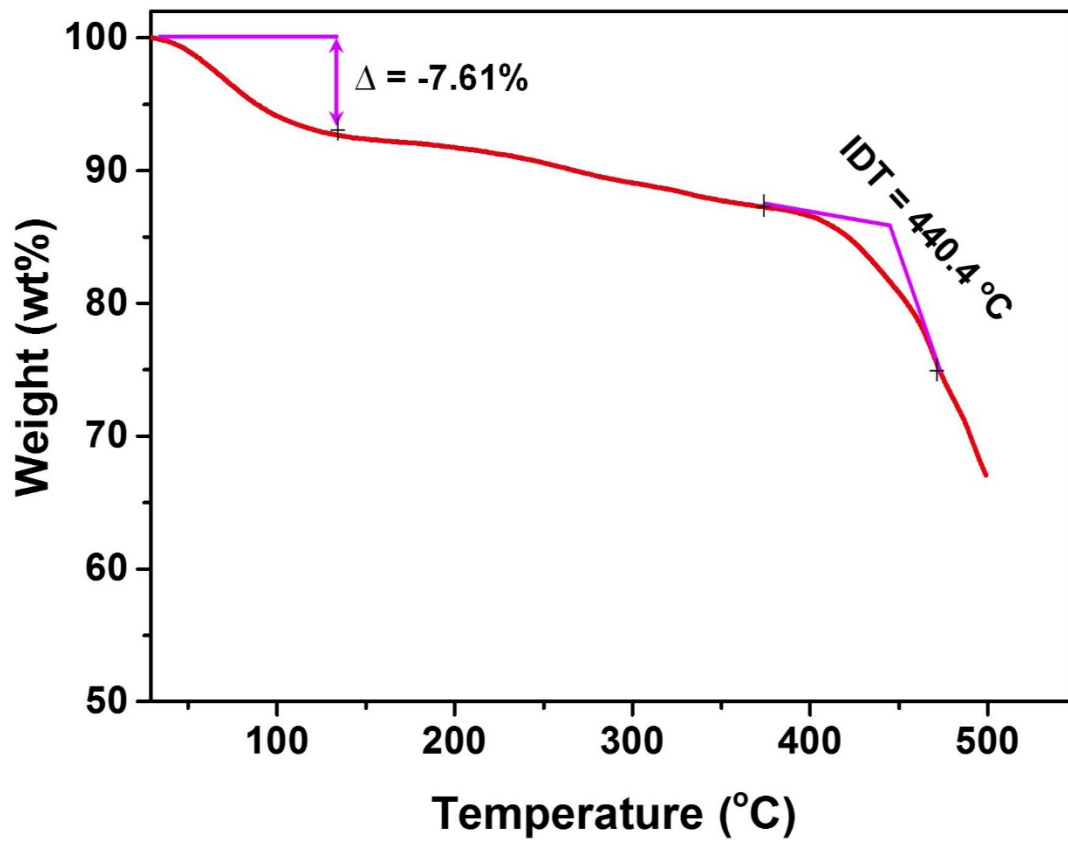

Fig. S2 TGA spectra of electrospun PMIA nanofibrous yarns.
